# Supplementary material
Source: ML conference proceedings conference paper supplement (https://aclanthology.org/2024.semeval-1.72)

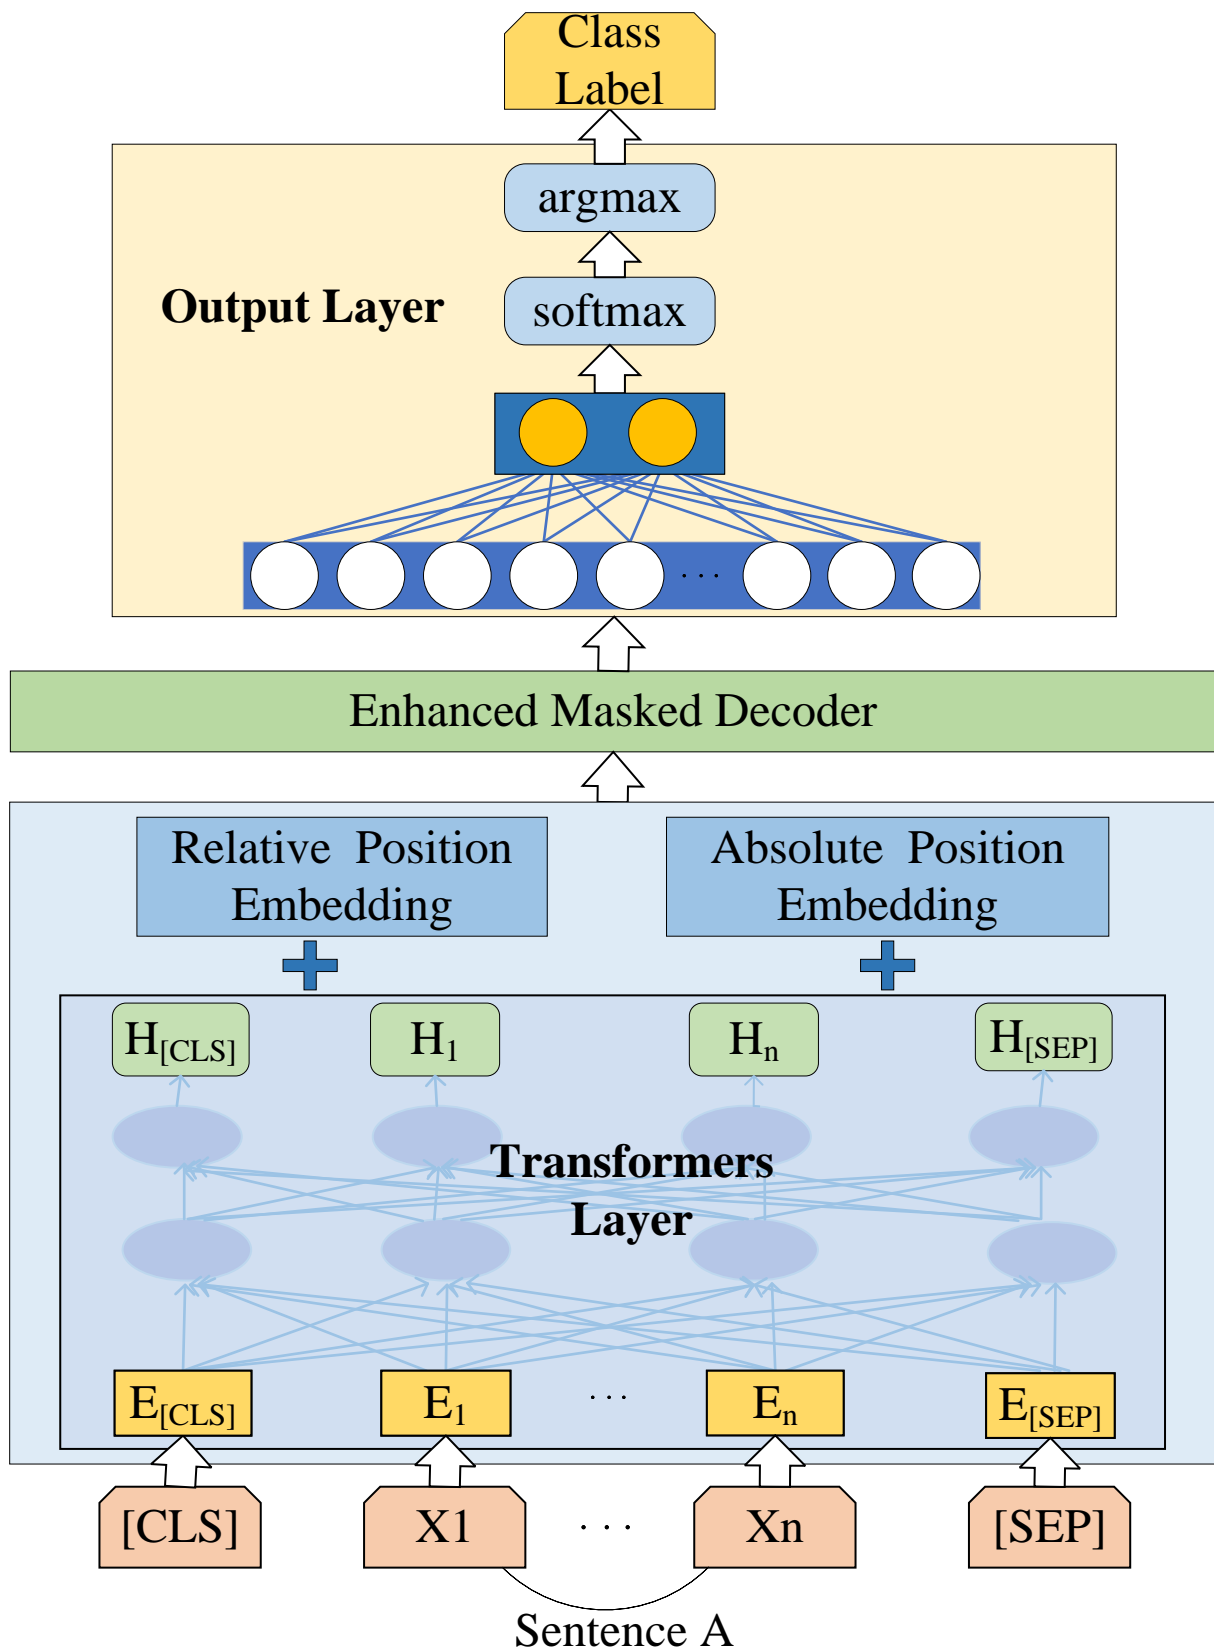

Supplement: SupplementaryMaterial [file 2024.semeval-1.72.SupplementaryMaterial.zip]

Accuracy of each strategy in dev data (Subtask 1)

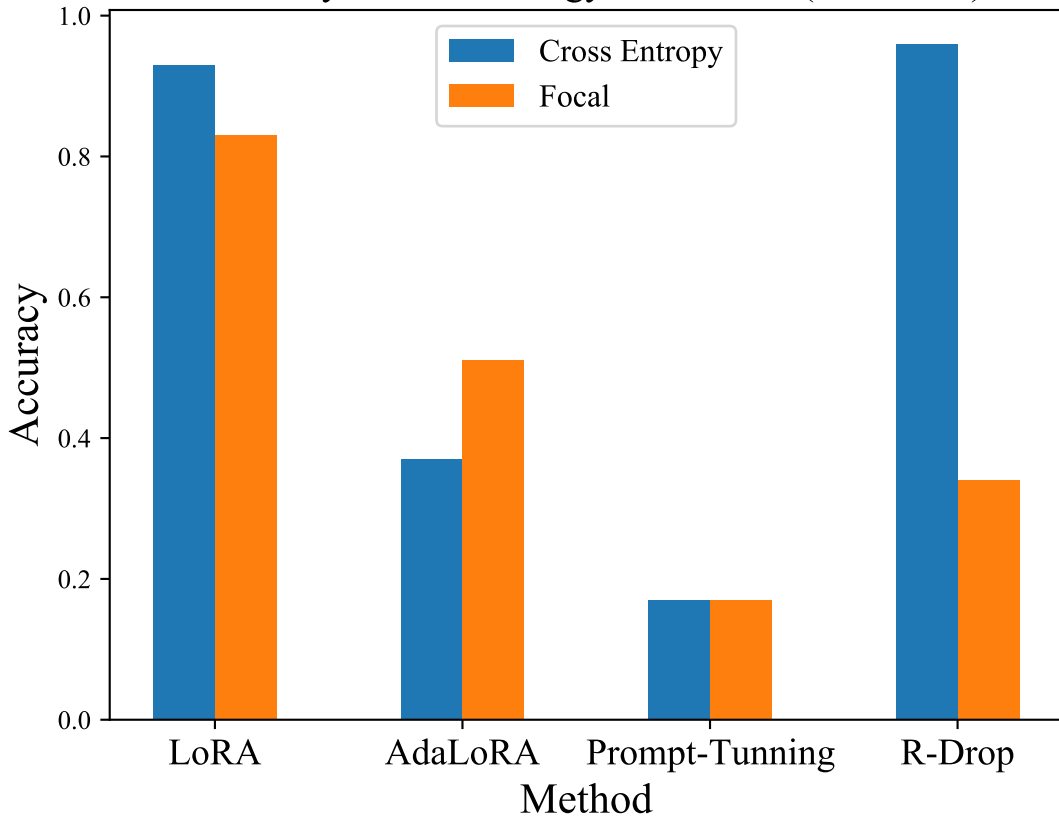

Supplement: SupplementaryMaterial [file 2024.semeval-1.72.SupplementaryMaterial.zip]

Accuracy of each strategy in dev data (Subtask 2)

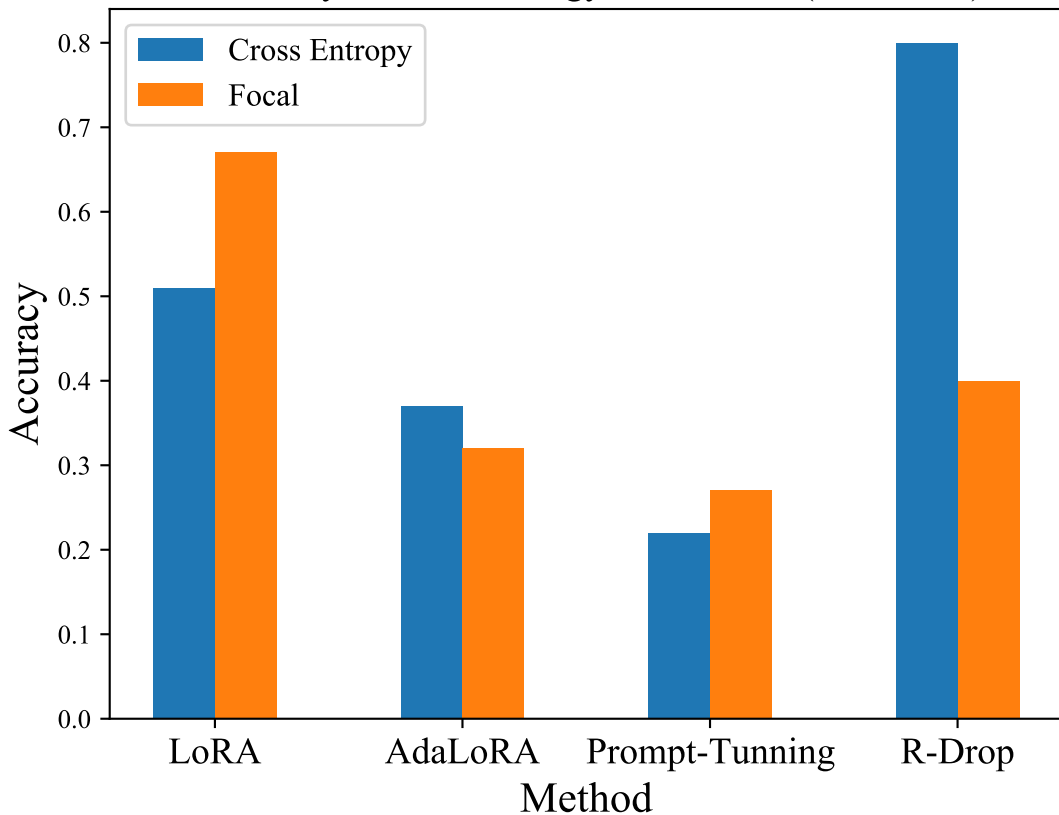

Supplement: SupplementaryMaterial [file 2024.semeval-1.72.SupplementaryMaterial.zip]
